# Supplementary material for: Overall Survival Improvement in Patients with Epidermal Growth Factor Receptor-Mutated Non-Small Cell Lung Cancer and Bone Metastasis Treated with Denosumab
Source: MDPI journal article supplement (doi:10.3390/cancers14143470), 2022-07-17
Supplement: s1 [file s1]

Article

# Overall Survival Improvement in Patients with Epidermal Growth Factor Receptor-Mutated Non-Small Cell Lung Cancer and Bone Metastasis Treated with Denosumab

How-Wen Ko, Chi-Tsun Chiu, Chih-Liang Wang, Tsung-Ying Yang, Chien-Ying Liu, Chih-Teng Yu, Li-Chuan Tseng, Chih-Hsi Kuo, Chin-Chou Wang, Muh-Hwa Yang and Cheng-Ta Yang

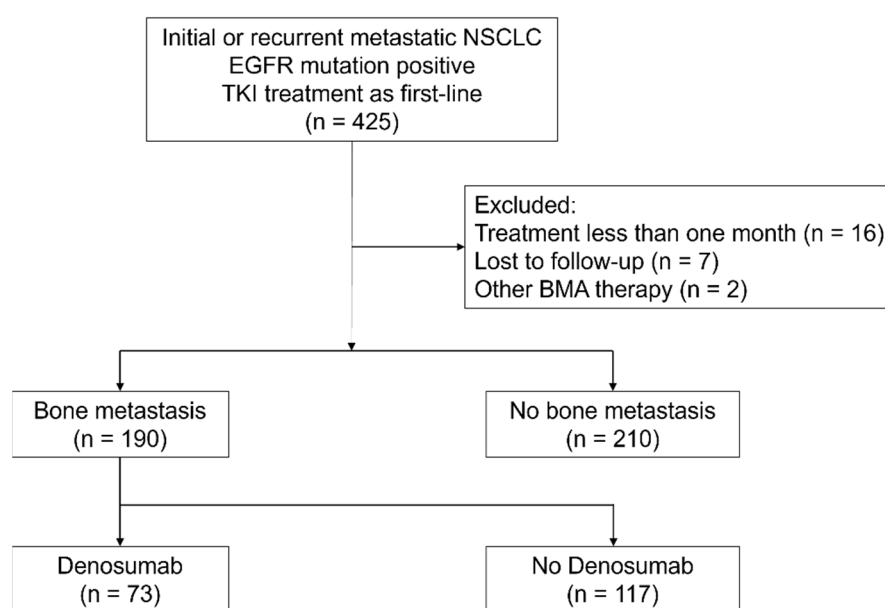

**Figure S1.** Flowchart of patient enrollment in this study. BMA, bone-modifying agent; EGFR, epidermal growth factor receptor; NSCLC, non-small cell lung cancer; TKI, tyrosine kinase inhibitor.

**Table S1.** Cox regression analysis of OS of all metastatic *EGFR*-mutated NSCLC patients.

| Variable                    | Univariate analysis |             |                | Multivariate analysis |             |                |
|-----------------------------|---------------------|-------------|----------------|-----------------------|-------------|----------------|
|                             | HR                  | 95% CI      | <i>p</i> value | HR                    | 95% CI      | <i>p</i> value |
| Age                         |                     |             |                |                       |             |                |
| ≥ 65                        | 1.047               | 0.829–1.322 | 0.701          | –                     | –           | –              |
| Sex                         |                     |             |                |                       |             |                |
| Female                      | 1.190               | 0.936–1.512 | 0.155          | –                     | –           | –              |
| ECOG PS                     |                     |             |                |                       |             |                |
| 2–4                         | 2.810               | 2.096–3.768 | < 0.001        | 2.471                 | 1.812–3.369 | < 0.001        |
| Smoking status              |                     |             |                |                       |             |                |
| Current/ex-smoker           | 0.995               | 0.744–1.331 | 0.975          | –                     | –           | –              |
| Histology                   |                     |             |                |                       |             |                |
| Adenocarcinoma              | 0.489               | 0.303–0.789 | 0.003          | 0.566                 | 0.343–0.935 | 0.026          |
| Metastasis                  |                     |             |                |                       |             |                |
| with lung/pleura/pericardia | 1.049               | 0.807–1.364 | 0.718          | –                     | –           | –              |
| with bone                   | 1.595               | 1.262–2.016 | < 0.001        | 1.372                 | 1.069–1.760 | 0.013          |
| with brain                  | 1.197               | 0.938–1.526 | 0.149          | –                     | –           | –              |
| with liver                  | 1.638               | 1.178–2.277 | 0.003          | 1.322                 | 0.909–1.924 | 0.144          |
| with adrenal/renal          | 2.259               | 1.606–3.179 | < 0.001        | 2.391                 | 1.670–3.423 | < 0.001        |
| with abdominal LNs/spleen   | 1.388               | 0.913–2.111 | 0.125          | –                     | –           | –              |
| <i>EGFR</i> mutation        |                     |             |                |                       |             |                |
| Exon 19 deletion            | 0.627               | 0.493       | 0.000          | 0.658                 | 0.514–0.842 | 0.001          |
| First-line <i>EGFR</i> -TKI |                     |             |                |                       |             |                |
| Afatinib                    | 0.817               | 0.644       | 0.096          | –                     | –           | –              |

CI, confidence interval; ECOG PS, Eastern Cooperative Oncology Group performance status; *EGFR*, epidermal growth factor receptor; HR, hazards ratio; LNs, lymph nodes; NSCLC, non-small cell lung cancer; OS, overall survival; TKI, tyrosine kinase inhibitor.
